# Supplementary material
Source: PubMed Central journal article supplement (PMC5853220)
Supplement: jix547_suppl_jix547_suppl_lietalfigs1.pdf [file jix547_suppl_jix547_suppl_lietalfigs1.pdf]

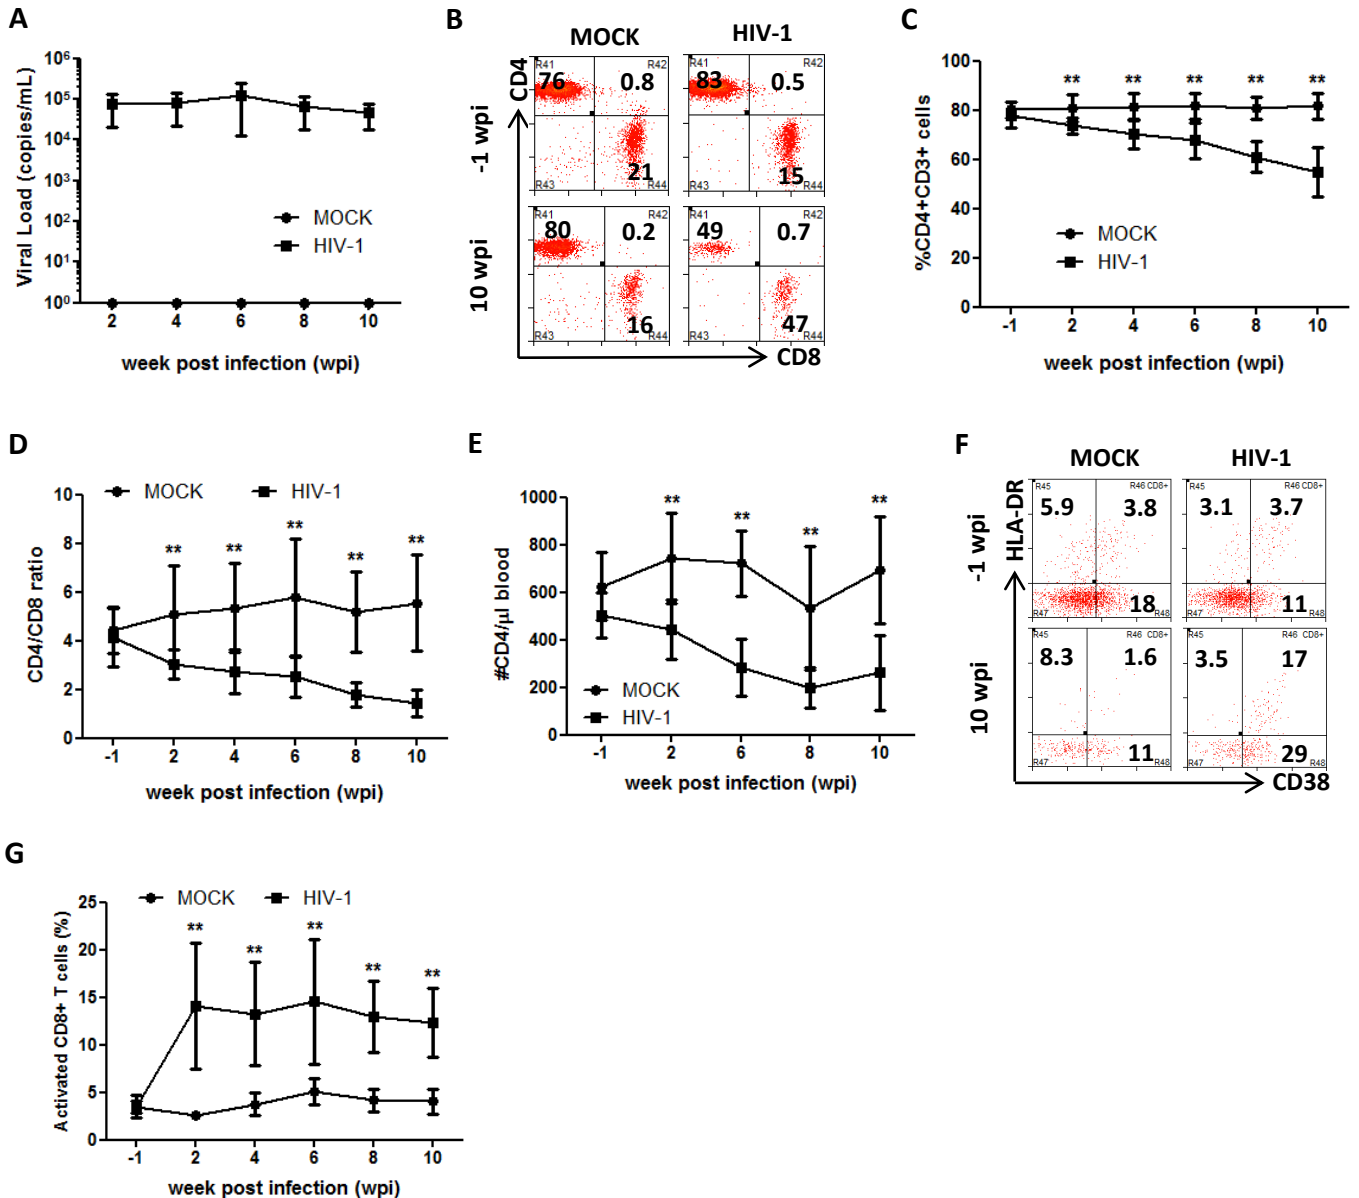

**Supplementary Figure 1. Humanized mice support persistent HIV-1 infection and respond to cART with cART-resistant HIV-1 reservoirs.** Humanized mice were infected with JRCSF and monitored until 10wpi. (MOCK, n=3; HIV-1, n=6). Week -1 indicates one week before infection. (A) Plasma viral load measured over time in HIV-1-infected humanized mice. (B) Representative flow cytometry plots of CD4 (y axis) vs CD8 (x axis) in CD3<sup>+</sup> human cells of the same mice in different groups at week -1 and 10wpi in blood. (C) CD4<sup>+</sup> T cells frequency (in CD3<sup>+</sup> cells) in blood over time. (D) The ratio of CD4<sup>+</sup> T/CD8 T cell in blood over time. (E) CD4<sup>+</sup> T cells number per microliter blood measured over time. (F) Representative flow cytometry plots of HLA-DR (y axis) and CD38 (x axis) expression on CD8 T cells of the same mice in different groups at week -1 and 10wpi in blood. (G) Percentage of HLA-DR<sup>+</sup>CD38<sup>+</sup> CD8 T cells in blood over time.
