# Supplementary material
Source: PubMed Central journal article supplement (PMC5853220)
Supplement: jix547_suppl_jix547_suppl_lietalfigs2.pdf [file jix547_suppl_jix547_suppl_lietalfigs2.pdf]

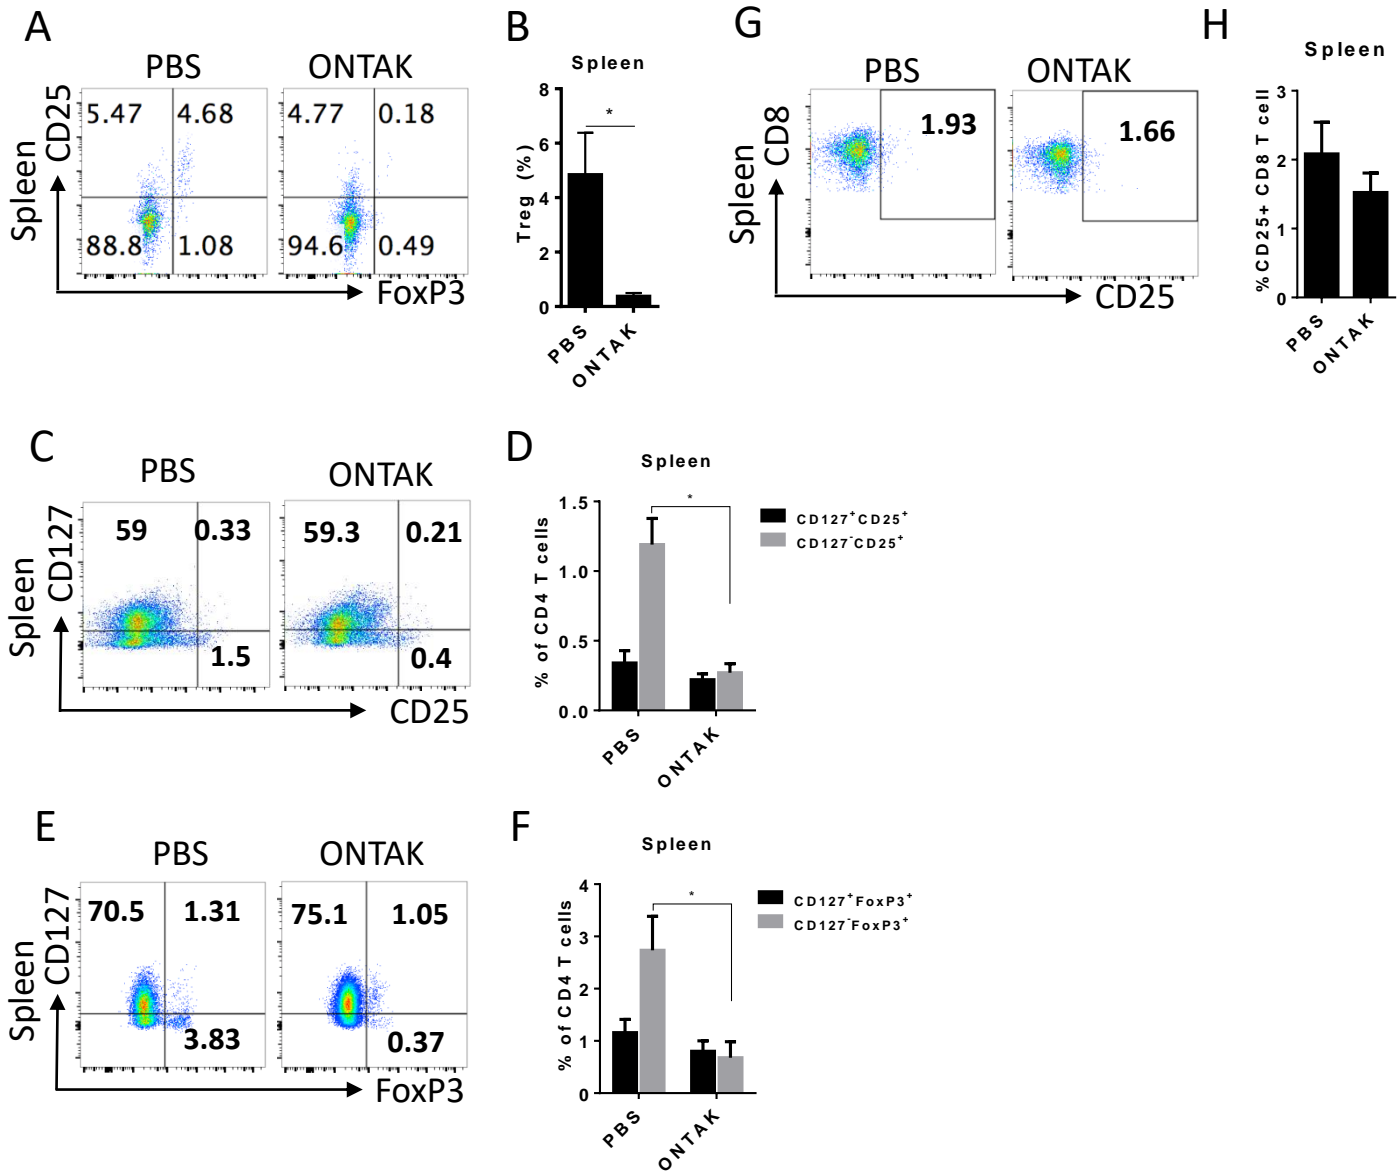

**Supplementary Figure 2. Specific depletion of Tregs by ONTAK in humanized mice.** Mice were treated with 100ug/kg ONTAK for 3 consecutive days and animals were terminated at day 2 after the last treatment (PBS n=3; ONTAK n=3.). (A) Representative plots show percentage of CD25<sup>+</sup>FoxP3<sup>+</sup> Treg cells in CD127<sup>-</sup> CD4 T cells (CD3<sup>+</sup>CD8<sup>-</sup>CD4<sup>+</sup>). (B) Summarized data show percentage of CD25<sup>+</sup>FoxP3<sup>+</sup> Treg cells in CD127<sup>-</sup> CD4 T cells (CD3<sup>+</sup>CD8<sup>-</sup>CD4<sup>+</sup>). (C) Representative plots show percentage of CD25<sup>+</sup> cells in CD127<sup>+</sup> CD4 T or CD127<sup>-</sup> CD4 T cells. (D) Summarized data show percentage of CD25<sup>+</sup> cells in CD127<sup>+</sup> CD4 T or CD127<sup>-</sup> CD4 T cells. (E) Representative plots show percentage of FoxP3<sup>+</sup> cells in CD127<sup>+</sup> CD4 T or CD127<sup>-</sup> CD4 T cells. (F) Summarized data show percentage of FoxP3<sup>+</sup> cells in CD127<sup>+</sup> CD4 T or CD127<sup>-</sup> CD4 T cells. (G) Representative plots show percentage of CD25<sup>+</sup> cells in CD8 T cells (CD3<sup>+</sup>CD4<sup>+</sup>CD8<sup>+</sup>). (H) Summarized data show percentage of CD25<sup>+</sup> cells in CD8 T cells. Bars represent standard deviations. \*, p < 0.05.
