# Supplementary material
Source: PubMed Central journal article supplement (PMC5853220)
Supplement: jix547_suppl_jix547_suppl_lietalfigs3.pdf [file jix547_suppl_jix547_suppl_lietalfigs3.pdf]

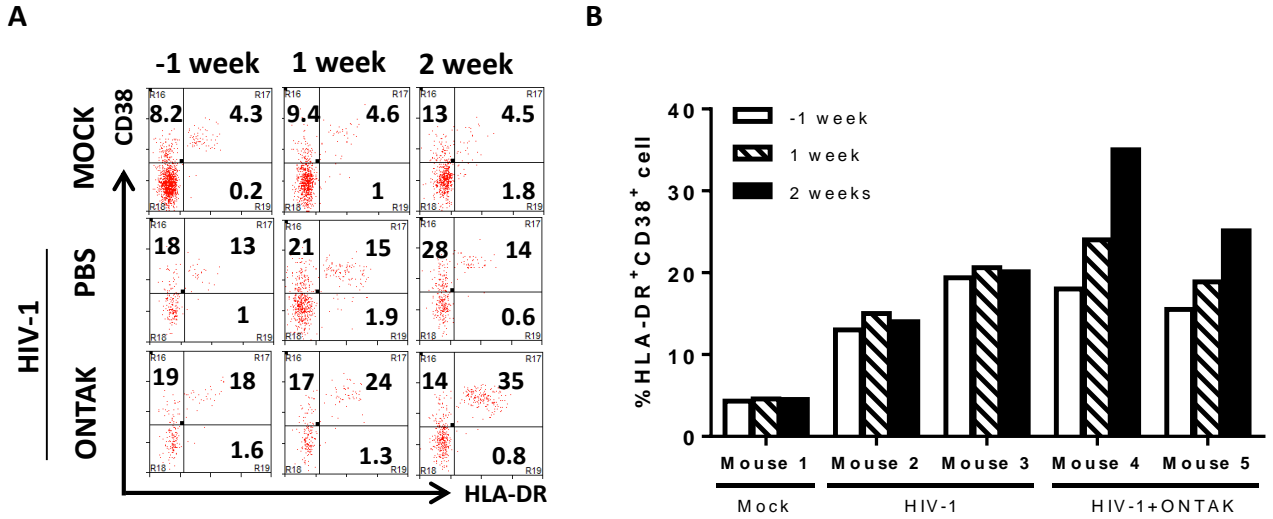

**Supplementary Figure 3. Tregs-depletion increases immune activation in chronic HIV-1 infection in humanized mice.** Animals were treated as in Figure 2. (A) Representative plots of HLA-DR (x axis) and CD38 (y axis) expression on CD8 T cells of the same mice in different groups at week -1 before ONTAK and week 1 or 2 after ONTAK treatment in blood. (B) Summarized percentage of HLA-DR<sup>+</sup>CD38<sup>+</sup> CD8 T cells for individual mice over time before or after ONTAK in blood.
