# Supplementary material
Source: PubMed Central journal article supplement (PMC5853220)
Supplement: jix547_suppl_jix547_suppl_lietalfigs4.pdf [file jix547_suppl_jix547_suppl_lietalfigs4.pdf]

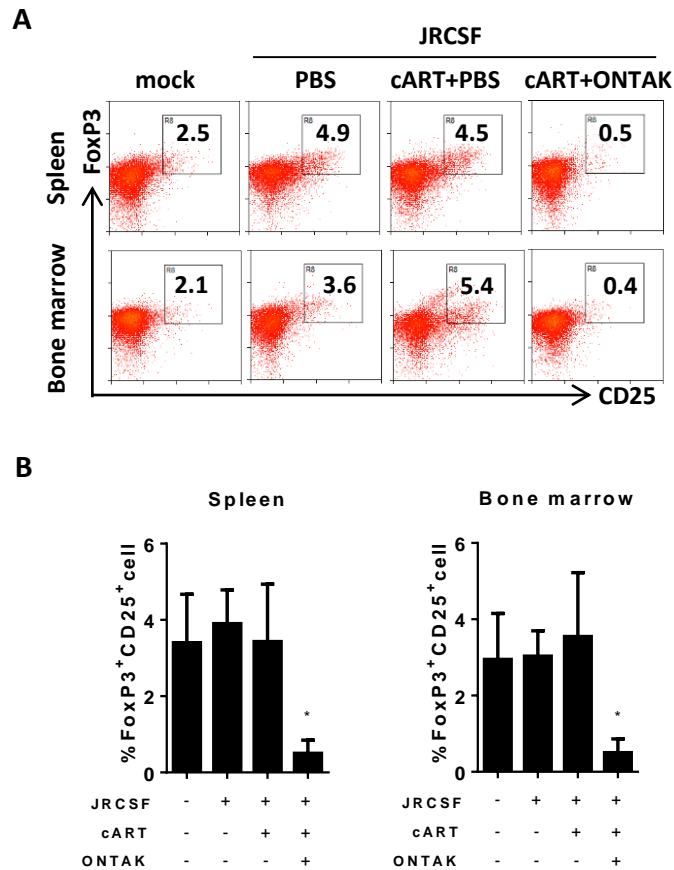

**Supplementary Figure 4. Tregs depletion by ONTAK treatment *in vivo*.** Humanized mice were treated as in Figure 3. Several mice were terminated at 12wpi (Mock, n=2; JRCSF+PBS, n=3; JRCSF+cART+PBS, n=6; JRCSF+cART+ONTAK, n=6). (A) Representative plots show the frequency of CD127-CD25<sup>+</sup>FoxP3<sup>+</sup> cells in CD4 T cells in spleen (SP) and bone marrow (BM) at 12wpi. (B) Summarized frequency of CD127-CD25<sup>+</sup>FoxP3<sup>+</sup> cells in CD4 T cells in spleen and bone marrow at 12wpi.
