# Supplementary material
Source: PubMed Central journal article supplement (PMC5853220)
Supplement: jix547_suppl_jix547_suppl_lietalfigs5.pdf [file jix547_suppl_jix547_suppl_lietalfigs5.pdf]

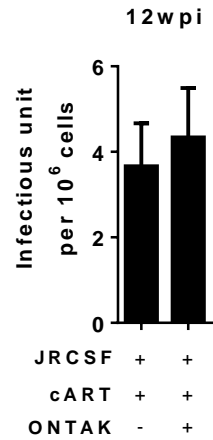

**Supplementary Figure 5. HIV-1 replication-competent virus producing cells in spleen.**

At 12wpi, replication-competent virus producing cells in spleens were detected by the quantitative virus outgrowth assay. The experiments were repeated two times. Data from two experiments are combined. Error bars display standard deviations.
