# Supplementary material
Source: PubMed Central journal article supplement (PMC5853220)
Supplement: jix547_suppl_jix547_suppl_lietalfigs6.pdf [file jix547_suppl_jix547_suppl_lietalfigs6.pdf]

A

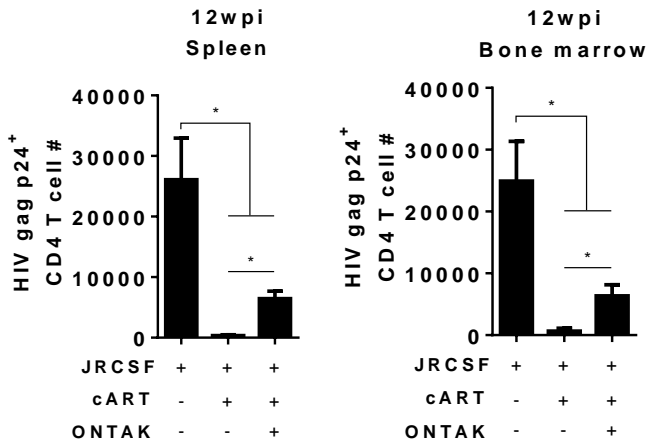

B

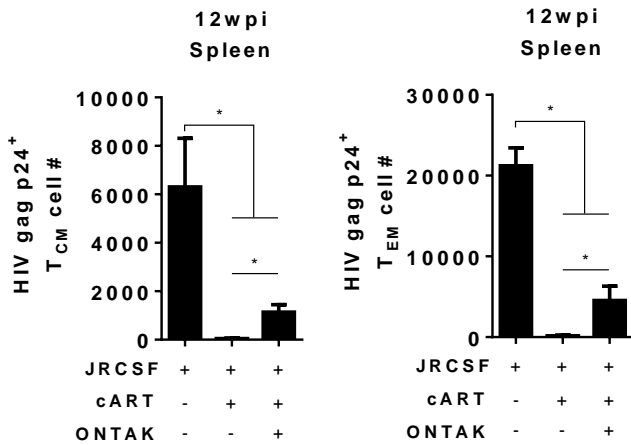

C

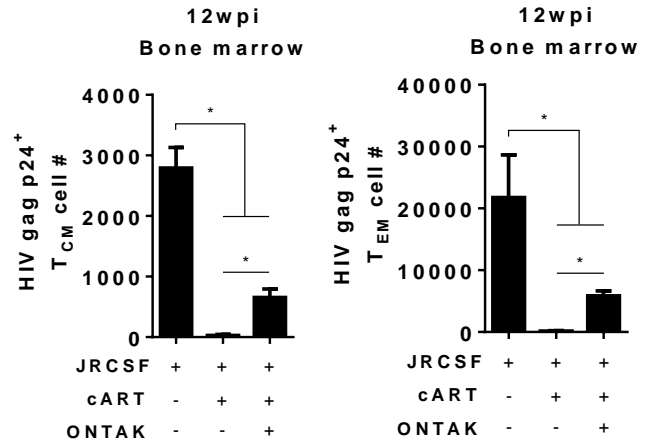

### Supplementary Figure 6. HIV-1 gag p24 positive CE4 T cell numbers in spleen and bone marrow.

Humanized mice were treated Figure 3. ONTAK injection started at 11wpi through i.p. and applied for 3 consecutive days (A) Summarized data show p24 positive CD3<sup>+</sup> CD8<sup>-</sup> T cell number in spleen and bone marrow at 12wpi. (B) Summarized data show p24 positive T<sub>CM</sub> (CD3<sup>+</sup>CD8<sup>-</sup>CCR7<sup>+</sup>CD45RA) and T<sub>EM</sub> (CD3<sup>+</sup>CD8<sup>-</sup>CCR7<sup>-</sup>CD45RA<sup>-</sup>) cell number in spleen at 12wpi. (C) Summarized data show p24 positive T<sub>CM</sub> and T<sub>EM</sub> cell number in bone marrow at 12wpi.
