# Supplementary material
Source: PubMed Central journal article supplement (PMC5853220)
Supplement: jix547_suppl_jix547_suppl_lietalfigs7.pdf [file jix547_suppl_jix547_suppl_lietalfigs7.pdf]

A

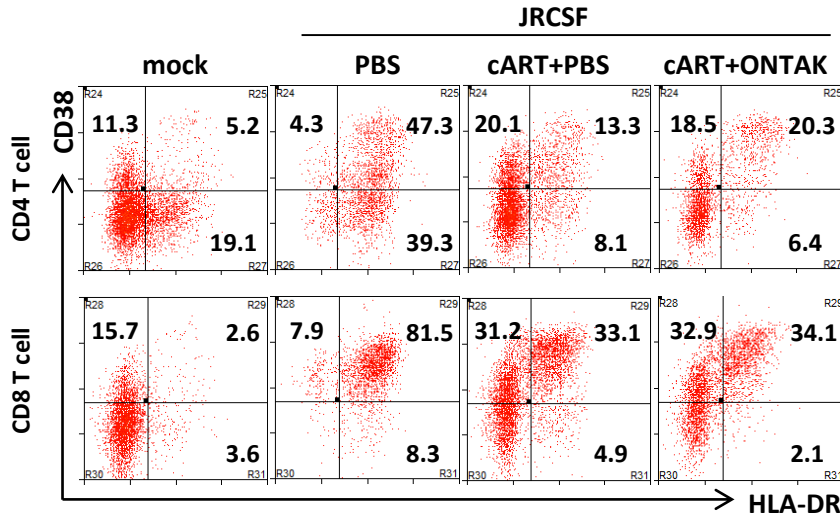

B

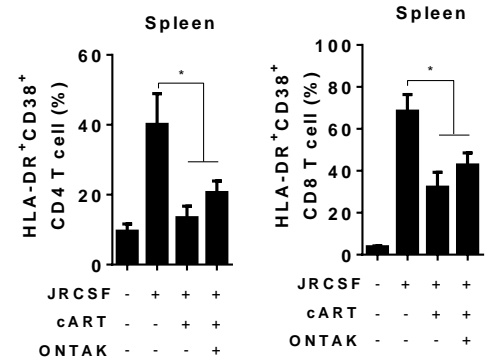

C

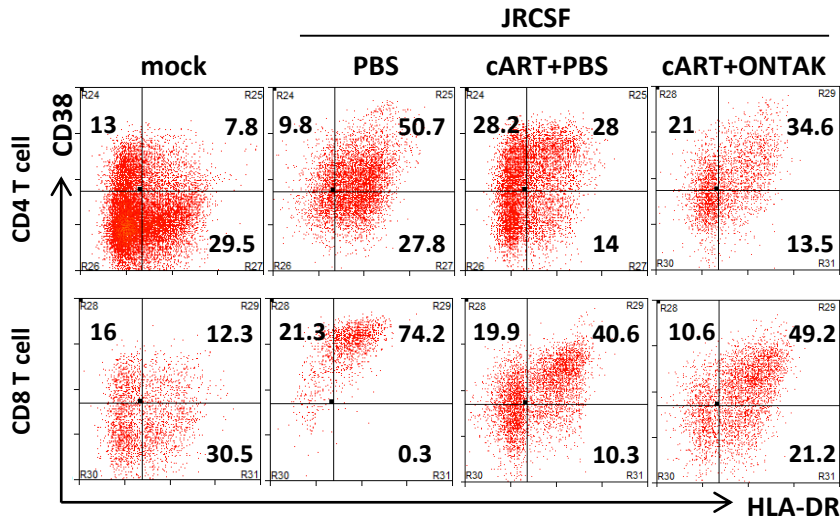

D

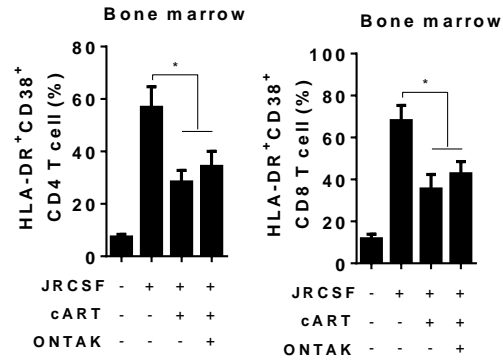

**Supplementary Figure 7. T cell activation is not significantly affected by ONTAK treatment.** Humanized mice were treated as in Figure 3. **(A)** The representative plots of HLA-DR<sup>+</sup> and CD38<sup>+</sup>CD4 or CD8 T cells in spleen. **(B)** Summarized data show HLA-DR<sup>+</sup> and CD38<sup>+</sup>CD4 or CD8 T cells in spleen. **(C)** The representative plots of HLA-DR<sup>+</sup> and CD38<sup>+</sup>CD4 or CD8 T cells in bone marrow. **(D)** Summarized data show HLA-DR<sup>+</sup> and CD38<sup>+</sup>CD4 or CD8 T cells in bone marrow. Error bars display standard deviations.
