# Supplementary material
Source: PubMed Central journal article supplement (PMC5853220)
Supplement: jix547_suppl_jix547_suppl_lietalfigs8.pdf [file jix547_suppl_jix547_suppl_lietalfigs8.pdf]

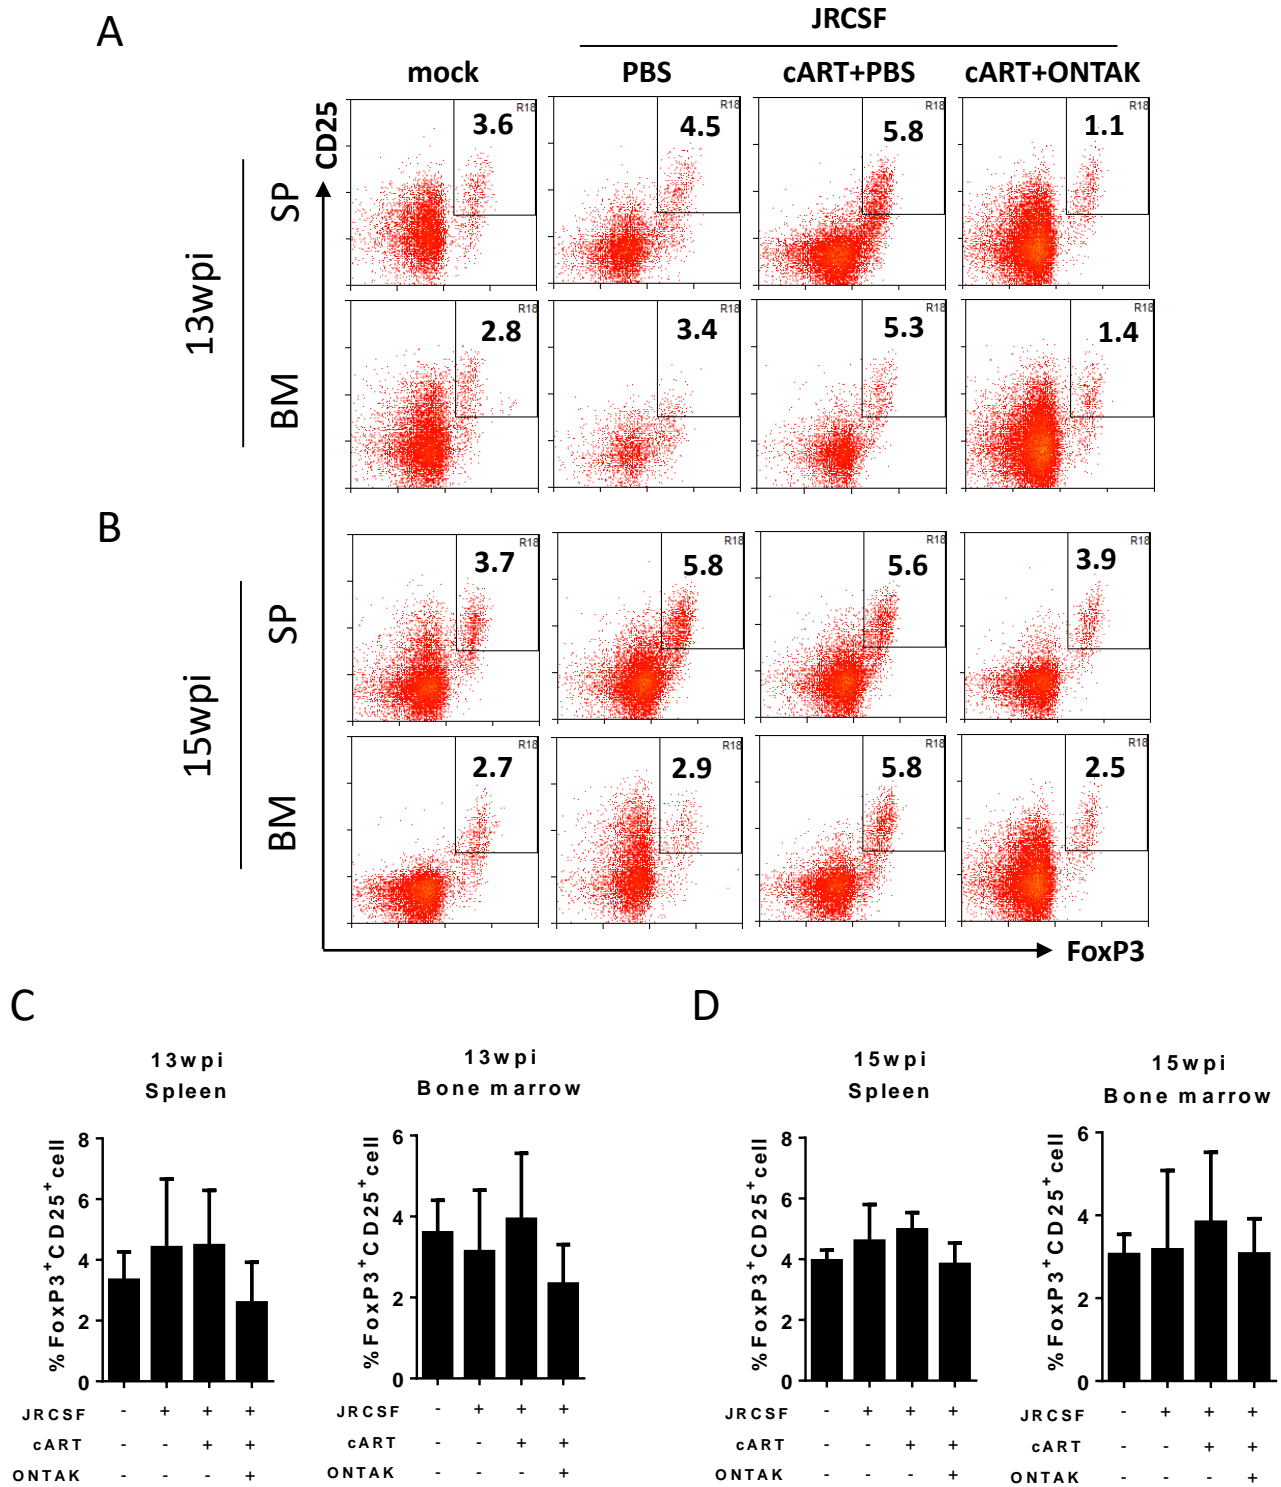

**Supplementary Figure 8. Frequency of CD25<sup>+</sup> FoxP3<sup>+</sup> Tregs after ONTAK treatment.** Humanized mice were treated as in Figure 3. ONTAK injection started at 11wpi through i.p. and applied for 3 consecutive days (A) Representative plots show percentage of CD127-CD25<sup>+</sup> FoxP3<sup>+</sup> cells in CD4<sup>+</sup> T cells in spleen and bone marrow at 13wpi. (B) Representative plots show percentage of CD25<sup>+</sup> FoxP3<sup>+</sup> cells in CD4<sup>+</sup> T cells in spleen and bone marrow at 15wpi. (C) Summary data for Supplementary Figure 3A. (D) Summary data for Supplementary Figure 3B.
