# Supplementary material
Source: PubMed Central journal article supplement (PMC5853220)
Supplement: jix547_suppl_jix547_suppl_lietalfigs10.pdf [file jix547_suppl_jix547_suppl_lietalfigs10.pdf]

A

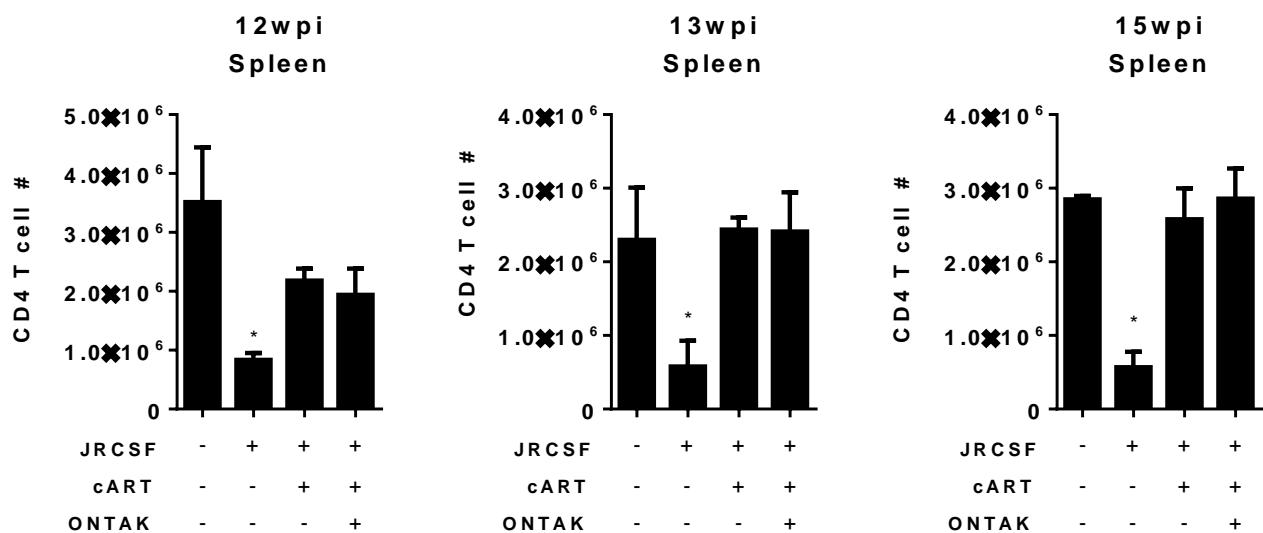

B

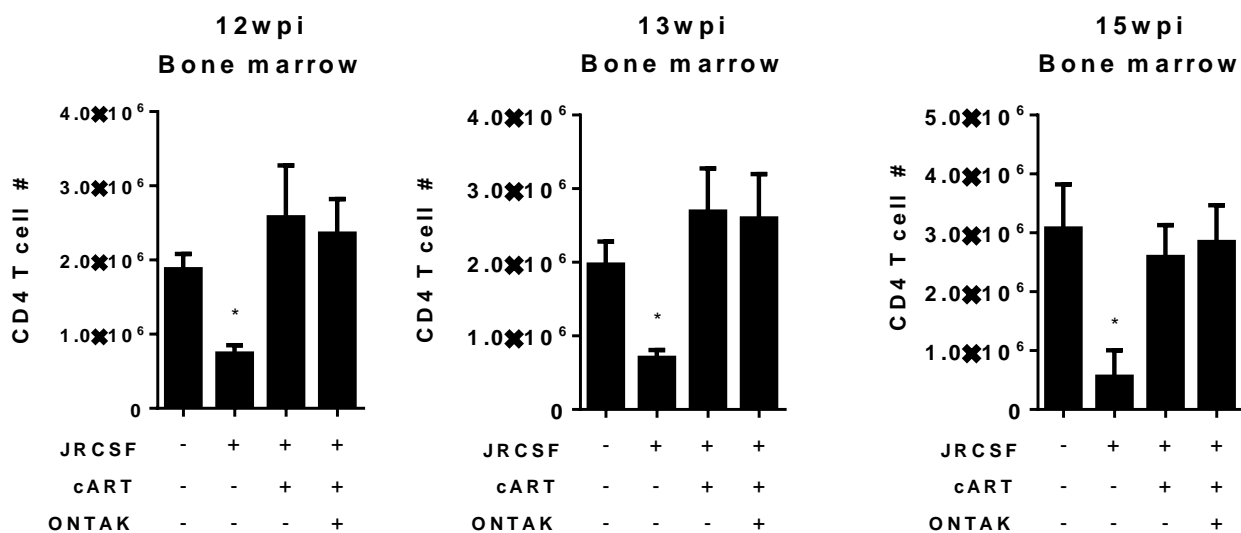

Supplementary Figure 10. Total human CD4 T cell numbers in spleen and bone marrow in mice terminated at 12wpi, 13wpi and 15wpi as in Figure 3A. Bars represent standard deviations. \*,  $p < 0.05$
