# Supplementary material
Source: PubMed Central journal article supplement (PMC5853220)
Supplement: jix547_suppl_jix547_suppl_lietalfigs13.pdf [file jix547_suppl_jix547_suppl_lietalfigs13.pdf]

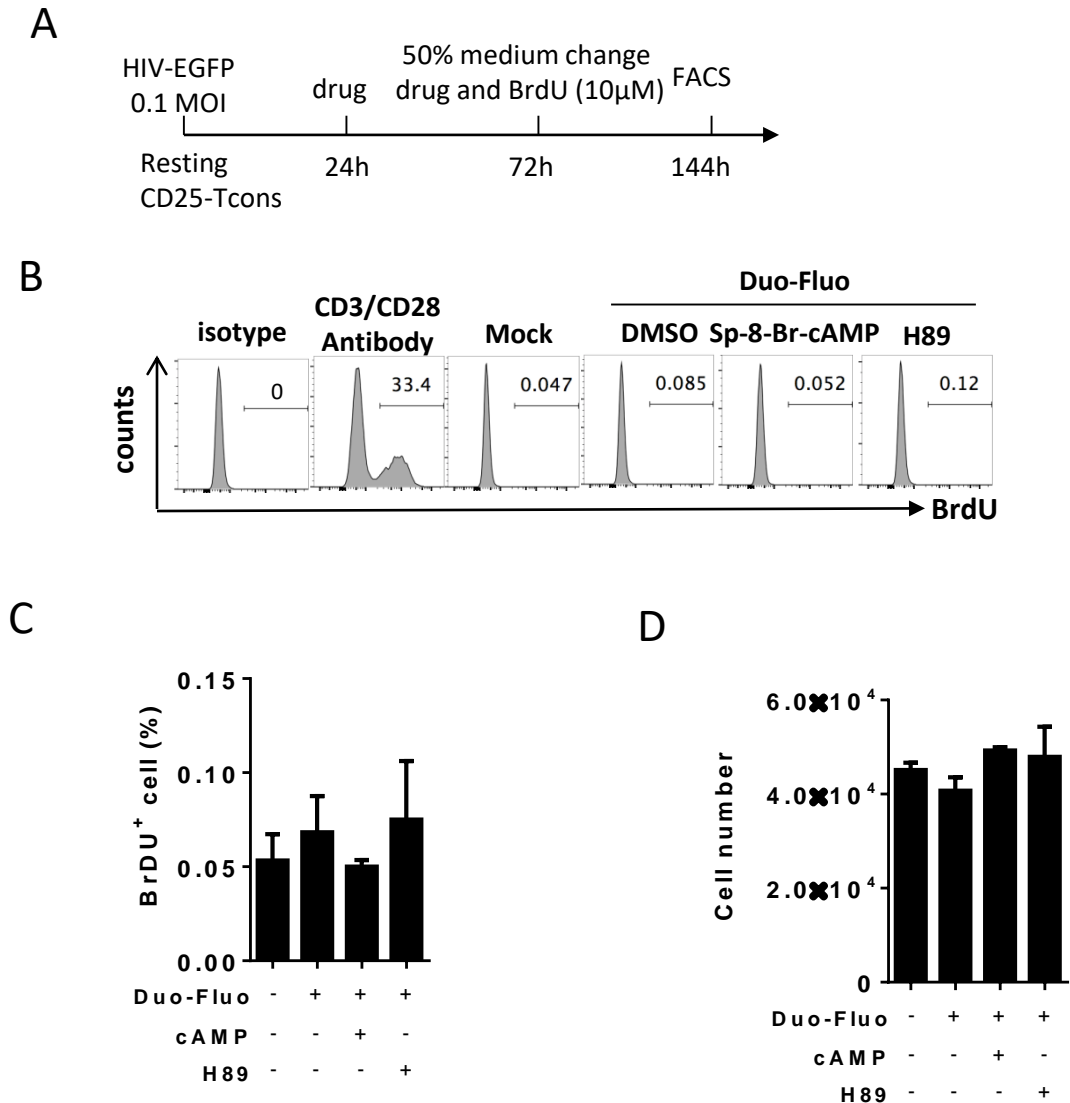

**Supplementary Figure 13. CD4 T cell proliferation.** (A) Experiment scheme. Resting Tcons were inoculated with 0.1 MOI HIV-EGFP. 24 hours later, cAMP agonist or PKA inhibitor was added into the culture. At 72 hours, half medium was changed with fresh medium containing same amount of each compound. Cells start treat with CD3/CD28 antibody (2µg/ml) at 72 hours for positive control of cell proliferation. All medium added at 72 hours containing 10µM BrdU. BrdU positive Tcons were analyzed at 144 hours. (B) Representative histogram show percentage of BrdU positive Tcons. (C) Summarized data show percentage of BrdU positive Tcons in each group. (D) Summarized data show Tcons cell number in each group at 144 hours. Bars represent standard deviations.
