# Supplementary material
Source: PubMed Central journal article supplement (PMC5853220)
Supplement: jix547_suppl_jix547_suppl_lietalfigstable1.pdf [file jix547_suppl_jix547_suppl_lietalfigstable1.pdf]

| Group            | Mice ID # | Spleen (termination) |                  |                  |                  | Termination               |     | HIV gag p24+CD3+CD8- T cell (%) |             | cART          |
|------------------|-----------|----------------------|------------------|------------------|------------------|---------------------------|-----|---------------------------------|-------------|---------------|
|                  |           | CD45 <sup>a</sup>    | CD3 <sup>b</sup> | CD4 <sup>c</sup> | CD8 <sup>c</sup> | Plasma HIV VL (copies/ml) | WPI | spleen                          | Bone marrow |               |
| MOCK             | 1304      | 66                   | 40               | 66               | 26               | ND <sup>d</sup>           | 12  | 0                               | 0.03        | Naive         |
| MOCK             | 1305      | 63                   | 72               | 60               | 30               | ND <sup>d</sup>           | 12  | 0.03                            | 0.08        | Naive         |
| MOCK             | 1451      | 59                   | 28               | 71               | 23               | ND <sup>d</sup>           | 13  | 0.07                            | 0.02        | Naive         |
| MOCK             | 1452      | 77                   | 51               | 63               | 32               | ND <sup>d</sup>           | 13  | 0                               | 0.06        | Naive         |
| MOCK             | 1454      | 34                   | 17               | 76               | 16               | ND <sup>d</sup>           | 13  | 0                               | 0.01        | Naive         |
| MOCK             | 1809      | 55                   | 43               | 72               | 21               | ND <sup>d</sup>           | 15  | 0                               | 0           | Naive         |
| MOCK             | 1810      | 46                   | 58               | 69               | 25               | ND <sup>d</sup>           | 15  | 0                               | 0           | Naive         |
| JRCSF+PBS        | 1300      | 37                   | 61               | 34               | 58               | 221800                    | 12  | 1.2                             | 6.17        | Naive         |
| JRCSF+PBS        | 1301      | 45                   | 59               | 53               | 30               | 199803                    | 12  | 3.8                             | 2.27        | Naive         |
| JRCSF+PBS        | 1302      | 27                   | 52               | 59               | 35               | 158183                    | 12  | 2.96                            | 1.99        | Naive         |
| JRCSF+PBS        | 1447      | 32                   | 38               | 56               | 36               | 501187                    | 13  | 1.76                            | 1.17        | Naive         |
| JRCSF+PBS        | 1448      | 42                   | 17               | 39               | 48               | 251188                    | 13  | 2.5                             | 7.91        | Naive         |
| JRCSF+PBS        | 1449      | 38                   | 13               | 55               | 35               | 630957                    | 13  | 4.57                            | 7.4         | Naive         |
| JRCSF+PBS        | 1801      | 26                   | 33               | 36               | 45               | 118051                    | 15  | 6.6                             | 6.29        | Naive         |
| JRCSF+PBS        | 1802      | 22                   | 21               | 35               | 48               | 791237                    | 15  | 3.11                            | 4.31        | Naive         |
| JRCSF+PBS        | 1803      | 29                   | 37               | 51               | 44               | 201236                    | 15  | 4.28                            | 5.5         | Naive         |
| JRCSF+cART+PBS   | 1306      | 18                   | 48               | 65               | 27               | ND <sup>d</sup>           | 12  | 0                               | 0.01        | PI+NNRTI+INTI |
| JRCSF+cART+PBS   | 1307      | 25                   | 41               | 50               | 43               | ND <sup>d</sup>           | 12  | 0.09                            | 0.1         | PI+NNRTI+INTI |
| JRCSF+cART+PBS   | 1308      | 69                   | 38               | 60               | 35               | ND <sup>d</sup>           | 12  | 0.02                            | 0.07        | PI+NNRTI+INTI |
| JRCSF+cART+PBS   | 1331      | 34                   | 32               | 50               | 43               | ND <sup>d</sup>           | 12  | 0.06                            | 0.05        | PI+NNRTI+INTI |
| JRCSF+cART+PBS   | 1332      | 64                   | 43               | 56               | 33               | ND <sup>d</sup>           | 13  | 0.05                            | 0.09        | PI+NNRTI+INTI |
| JRCSF+cART+PBS   | 1333      | 70                   | 49               | 57               | 39               | ND <sup>d</sup>           | 13  | 0                               | 0.08        | PI+NNRTI+INTI |
| JRCSF+cART+PBS   | 1459      | 65                   | 58               | 64               | 22               | ND <sup>d</sup>           | 12  | 0.08                            | 0           | PI+NNRTI+INTI |
| JRCSF+cART+PBS   | 1460      | 54                   | 39               | 41               | 50               | ND <sup>d</sup>           | 12  | 0                               | 0.01        | PI+NNRTI+INTI |
| JRCSF+cART+PBS   | 1461      | 68                   | 77               | 74               | 18               | ND <sup>d</sup>           | 13  | 0.02                            | 0           | PI+NNRTI+INTI |
| JRCSF+cART+PBS   | 1465      | 26                   | 49               | 65               | 25               | ND <sup>d</sup>           | 13  | 0                               | 0.02        | PI+NNRTI+INTI |
| JRCSF+cART+PBS   | 1467      | 42                   | 76               | 56               | 35               | ND <sup>d</sup>           | 13  | 0                               | 0.01        | PI+NNRTI+INTI |
| JRCSF+cART+PBS   | 1806      | 39                   | 52               | 66               | 28               | ND <sup>d</sup>           | 15  | 0.01                            | 0           | PI+NNRTI+INTI |
| JRCSF+cART+PBS   | 1807      | 42                   | 48               | 70               | 25               | ND <sup>d</sup>           | 15  | 0                               | 0           | PI+NNRTI+INTI |
| JRCSF+cART+PBS   | 1808      | 44                   | 51               | 62               | 30               | ND <sup>d</sup>           | 15  | 0.05                            | 0.006       | PI+NNRTI+INTI |
| JRCSF+cART+ONTAK | 1309      | 58                   | 42               | 63               | 32               | 657                       | 12  | 0.44                            | 0.33        | PI+NNRTI+INTI |
| JRCSF+cART+ONTAK | 1310      | 63                   | 42               | 61               | 30               | 1260                      | 12  | 0.53                            | 0.43        | PI+NNRTI+INTI |
| JRCSF+cART+ONTAK | 1311      | 75                   | 44               | 61               | 33               | 1542                      | 12  | 0.37                            | 0.16        | PI+NNRTI+INTI |
| JRCSF+cART+ONTAK | 1314      | 35                   | 56               | 60               | 35               | 1805                      | 12  | 0.27                            | 0.16        | PI+NNRTI+INTI |
| JRCSF+cART+ONTAK | 1315      | 74                   | 38               | 52               | 43               | ND <sup>d</sup>           | 13  | 0.2                             | 0.25        | PI+NNRTI+INTI |
| JRCSF+cART+ONTAK | 1316      | 34                   | 36               | 61               | 29               | ND <sup>d</sup>           | 13  | 0                               | 0           | PI+NNRTI+INTI |
| JRCSF+cART+ONTAK | 1450      | 67                   | 45               | 72               | 21               | 1383                      | 12  | 0.23                            | 0.2         | PI+NNRTI+INTI |
| JRCSF+cART+ONTAK | 1458      | 49                   | 55               | 57               | 37               | 1280                      | 12  | 0.36                            | 0.31        | PI+NNRTI+INTI |
| JRCSF+cART+ONTAK | 1462      | 51                   | 43               | 60               | 31               | ND <sup>d</sup>           | 13  | 0                               | 0           | PI+NNRTI+INTI |
| JRCSF+cART+ONTAK | 1463      | 37                   | 50               | 64               | 34               | ND <sup>d</sup>           | 13  | 0.02                            | 0.02        | PI+NNRTI+INTI |
| JRCSF+cART+ONTAK | 1464      | 42                   | 76               | 56               | 35               | ND <sup>d</sup>           | 13  | 0                               | 0.01        | PI+NNRTI+INTI |
| JRCSF+cART+ONTAK | 1466      | 52                   | 69               | 65               | 30               | ND <sup>d</sup>           | 13  | 0                               | 0.03        | PI+NNRTI+INTI |
| JRCSF+cART+ONTAK | 1811      | 46                   | 56               | 64               | 31               | ND <sup>d</sup>           | 15  | 0                               | 0.02        | PI+NNRTI+INTI |
| JRCSF+cART+ONTAK | 1812      | 41                   | 59               | 68               | 27               | ND <sup>d</sup>           | 15  | 0.02                            | 0.04        | PI+NNRTI+INTI |
| JRCSF+cART+ONTAK | 1815      | 52                   | 60               | 67               | 26               | ND <sup>d</sup>           | 15  | 0.06                            | 0.05        | PI+NNRTI+INTI |

a Percentage of human CD45+ of total cell.

b Percentage of CD3+ from human CD45+ cells.

c Percentage of CD4+ CD8+ from human CD45+CD3+ cells.

d ND; not detected.

### Supplementary Table 1. Humanized mice with suppressed HIV-1 infection under cART treatment and mice with rebounded viral load after ONTAK treatment.
