# Supplementary material
Source: PubMed Central journal article supplement (PMC5853220)

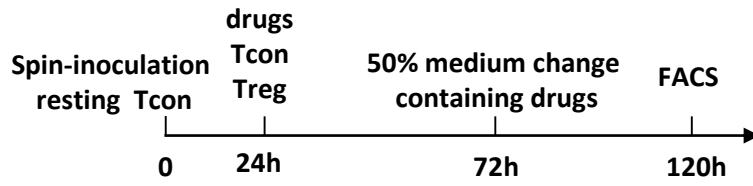

Supplementary Figure 11. Experiment scheme for Figure 7.

Supplement: jix547_suppl_jix547_suppl_lietalfigs11.pdf [file jix547_suppl_jix547_suppl_lietalfigs11.pdf]
